# Supplementary material for: Self-assembling in fabrication of ordered porphyrins and phthalocyanines hybrid nano-arrays on HOPG
Source: Royal Society of Chemistry journal article supplement (doi:10.1039/c3ce40340h), 2013-01-01
Supplement: c3ce40340h.pdf [file c3ce40340h.pdf]

## Supporting Information

# Self-Assembling in Fabrication of Ordered Porphyrins and Phthalocyanines Hybrid Nano-Arrays on HOPG

*Yongtao Shen*<sup>a,b</sup>, *Ke Deng*,<sup>b</sup> *Min Li*,<sup>d</sup> *Xuemei Zhang*<sup>b</sup>, *Gang Zhou*<sup>\*c</sup>, *Klaus Müllen*<sup>\*e</sup>, *Qingdao Zeng*<sup>\*b</sup>,  
*Chen Wang*<sup>\*b</sup>

## TABLE OF CONTENTS

|                                                                                                             |    |
|-------------------------------------------------------------------------------------------------------------|----|
| 1. A high resolution STM image of P14/tetradecane binary structure. ....                                    | S2 |
| 2. A large-area STM image (158 nm × 158 nm, I = 348 pA, V = -700 mV) of P14/Pc/tetradecane monolayers.....  | S3 |
| 3. The simulation of the P14/FPc bilayer structure.....                                                     | S4 |
| 4. STM images of P14/F16CuPc/tetradecane and P14 /tetradecane architectures co-selfassemble on surface..... | S5 |

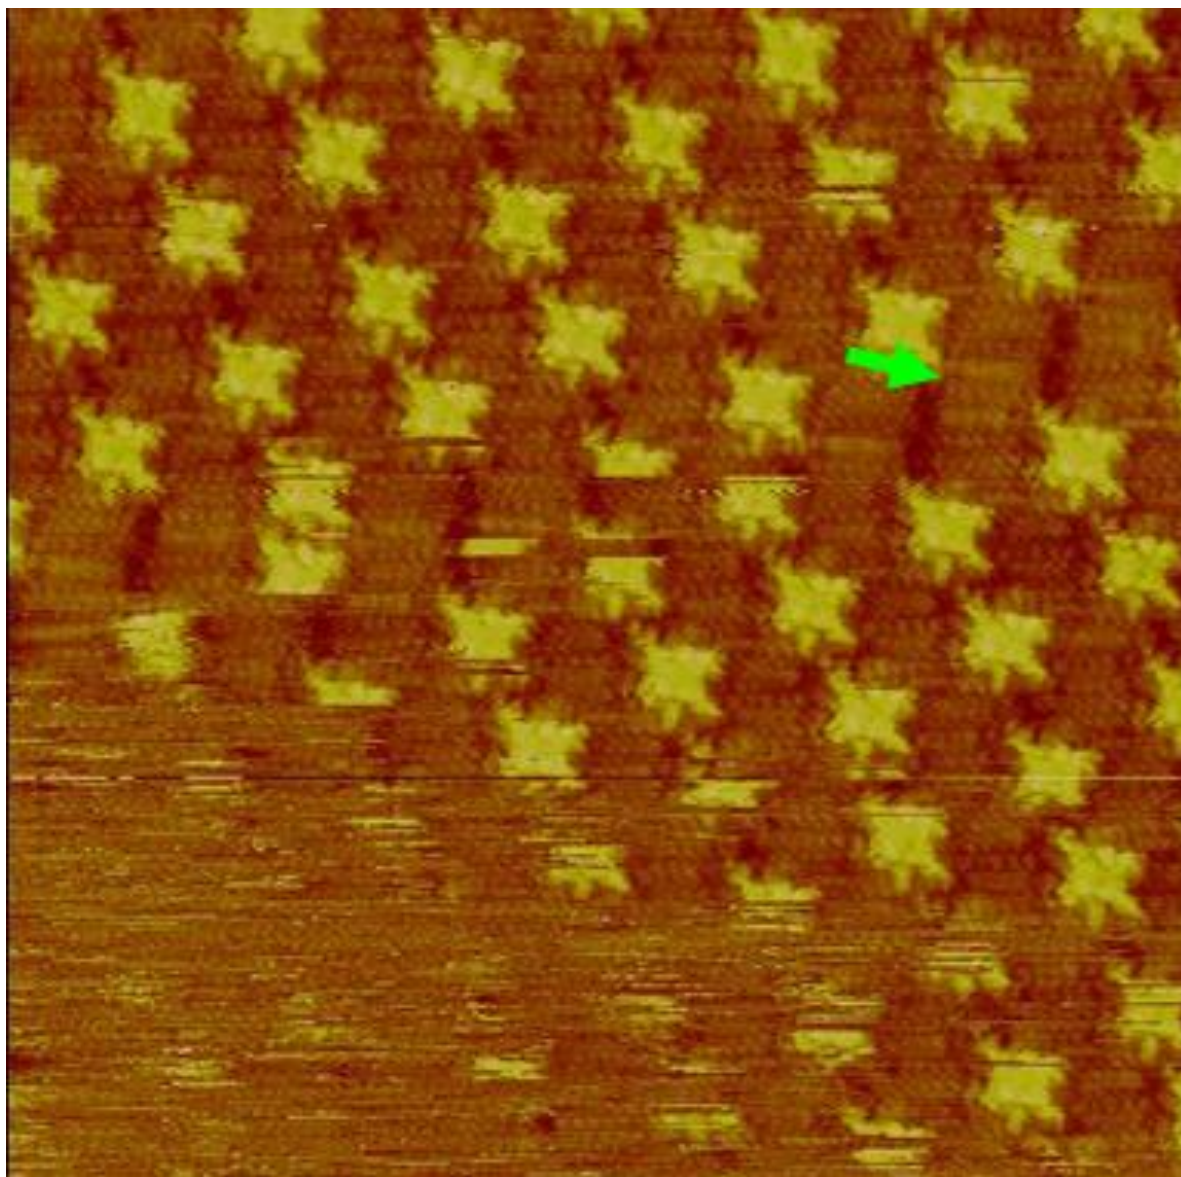

Figure S1. A high resolution STM image ( $21 \text{ nm} \times 21 \text{ nm}$ ,  $I = 391 \text{ pA}$ ,  $V = -702 \text{ mV}$ ) of P14/tetradecane binary structure. A green arrow directs tetradecane molecules, which are co-adsorbed in the P14 nano structures.

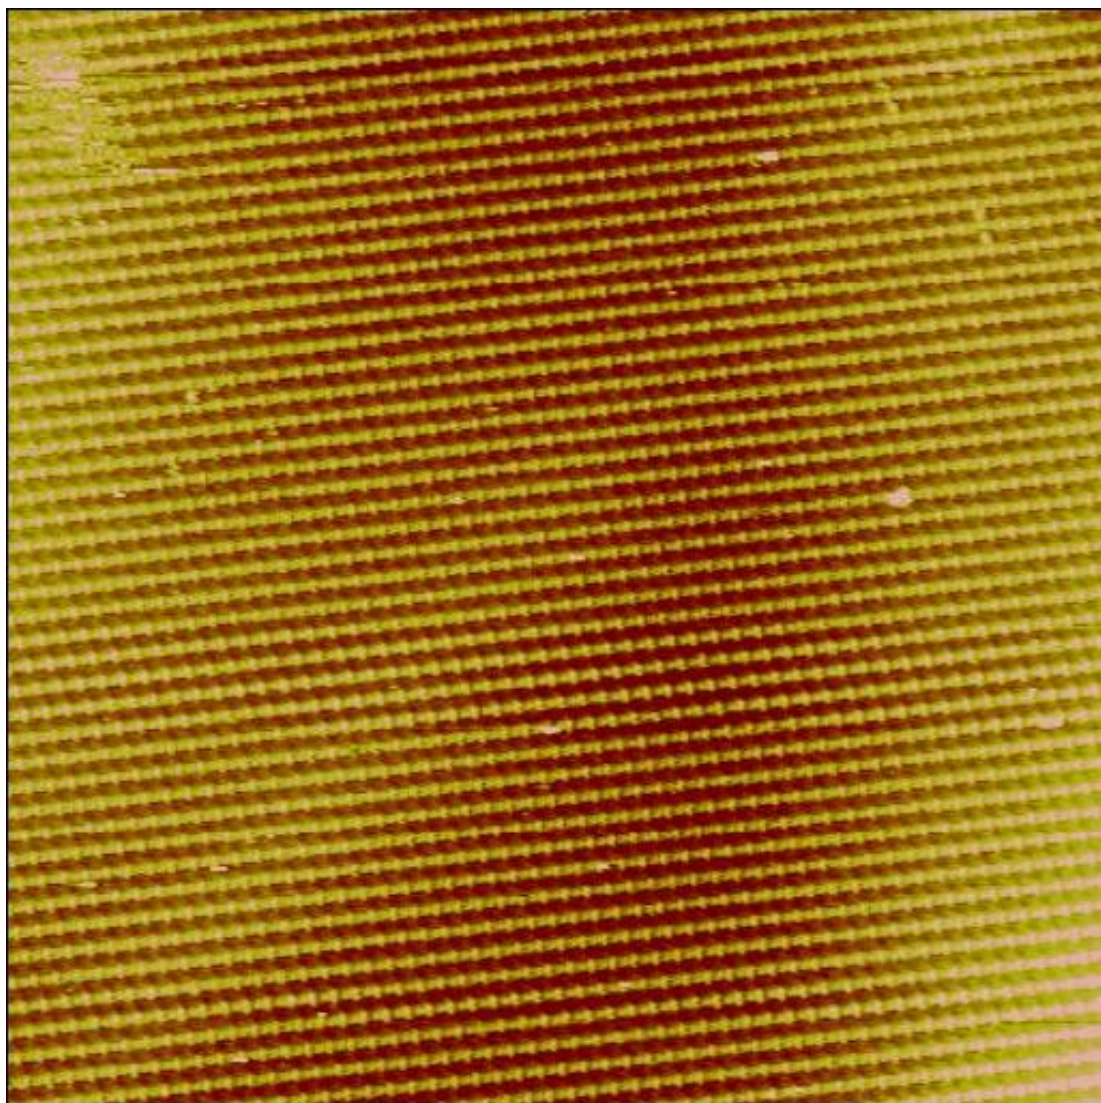

Figure S2. A large-area STM image ( $158 \text{ nm} \times 158 \text{ nm}$ ,  $I = 348 \text{ pA}$ ,  $V = -700 \text{ mV}$ ) of P14/Pc/tetradecane monolayers physisorbed at the tetradecane/HOPG interface after annealing at  $60^\circ\text{C}$ .



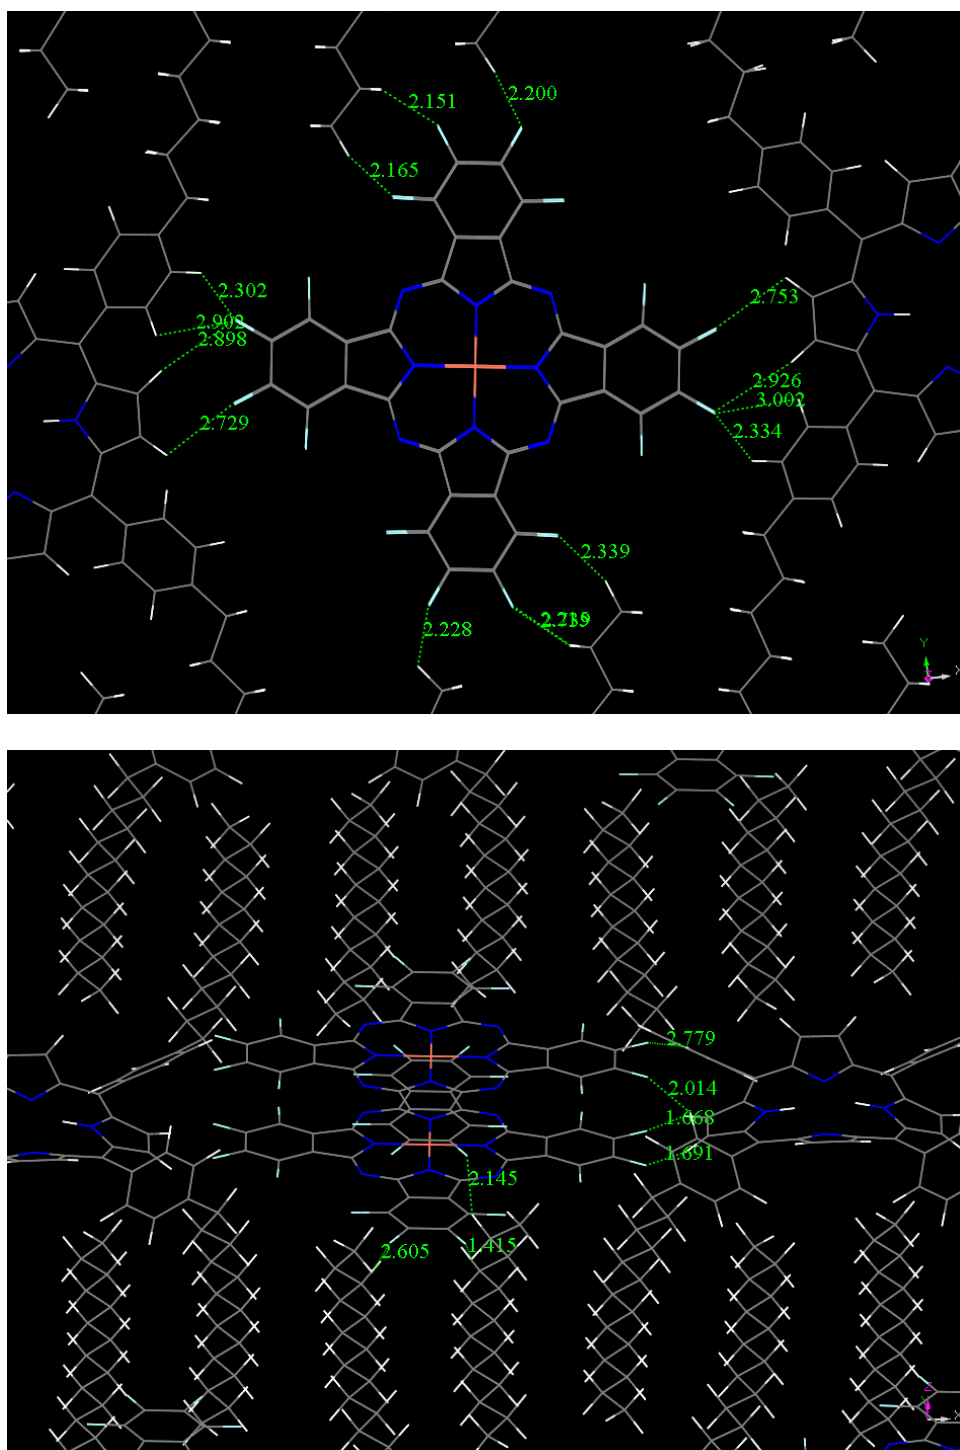

Figure S3. a) The top view image of the simulation of the P14/FpC bilayer structure. (b) The side view image of the simulation of the P14/FpC bilayer structure.

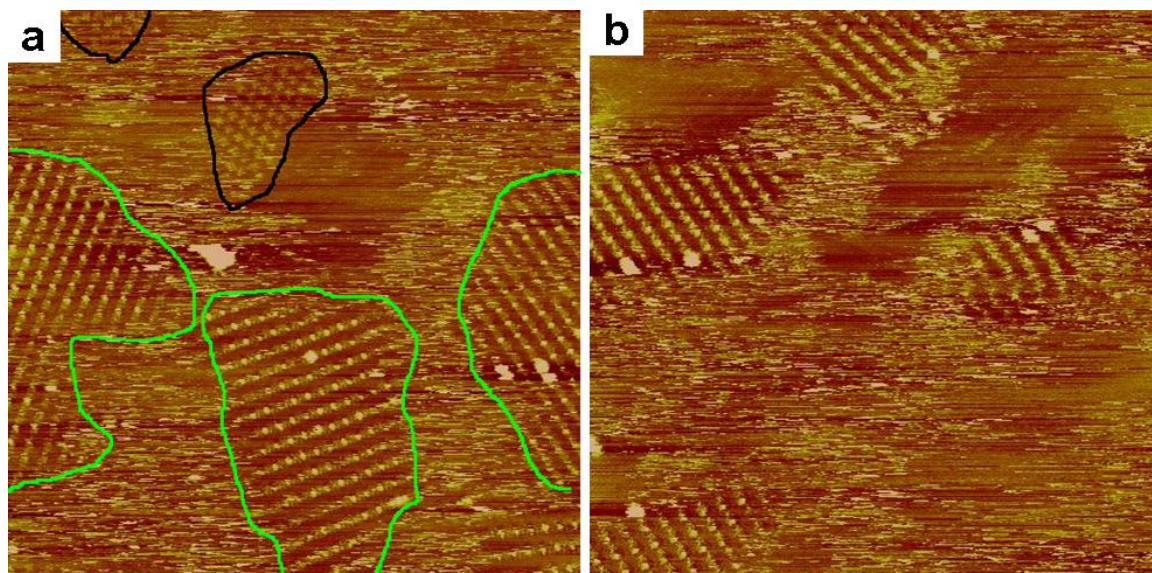

Figure S4. (a) An STM image ( $120 \text{ nm} \times 120 \text{ nm}$ ,  $I = 253 \text{ pA}$ ,  $V = 690 \text{ mV}$ ) of P14/F16CuPc/tetradecane and P14 /tetradecane architectures co-selfassemble on surface at the P14: F16CuPc = 3 : 1. The P14/F16CuPc/tetradecane architectures are marked by green lines and P14 /tetradecane architectures are marked by black lines. (b) An STM image ( $103 \text{ nm} \times 103 \text{ nm}$ ,  $I = 186 \text{ pA}$ ,  $V = 189 \text{ mV}$ ) of P14/F16CuPc/tetradecane architectures selfassemble on surface at the P14: F16CuPc = 1 : 5.
